# Supplementary material for: Estimating fractional snow cover from passive microwave brightness temperature data using MODIS snow cover product over North America
Source: Copernicus journal article supplement (doi:10.5194/tc-2019-280), 2020-01-07
Supplement: Supplementary file 1 [file tc-2019-280-supplement.pdf]

# Supplement to: Estimating fractional snow cover from passive microwave brightness temperature data using MODIS snow cover product over North America

Xiongxin Xiao<sup>1</sup>, Shunlin Liang<sup>2</sup>, Tao He<sup>1</sup>, Daiqiang Wu<sup>1</sup>, Congyuan Pei<sup>1</sup>, Jianya Gong<sup>1</sup>

<sup>1</sup> School of Remote Sensing and Information Engineering, Wuhan University, Wuhan 430079, China

<sup>2</sup> Department of Geographical Sciences, University of Maryland, College Park, MD 20742, USA

Correspondence to: Tao He (taohers@whu.edu.cn)

## Lists:

Table S1. MODIS NDSI snow cover layer recoding description

Table S2. The statistics of top nine important variables for random forest

Table S3. The optimization tests of learning rate of ANN on prairie dataset of 2017.

Table S4. Variable selection tests in 6 scenarios on three land cover types (forest, shrub and prairie). The accuracy indexes of the estimation are calculated using OOB error estimates method.

Table S5. Variable selection tests in 6 scenarios on three land cover types (forest, shrub and prairie). The accuracy indexes of the estimation are calculated using 10-fold cross validation (CV).

Table S6. The parameters of Linear regression formula

Figure S-1. Using OOB error estimates to evaluate the performance of random forest models with increasing training sample size for forest type

Figure S-2. Using OOB error estimates to evaluate the performance of random forest models with increasing training sample size for prairie type

Figure S-3. Using OOB error estimates to evaluate the performance of random forest models with increasing training sample size for bare land type

Figure S-4. The color-density scatter plots between the estimated fractional snow cover and MODIS-derived fractional snow cover for four algorithms (linear regression, ANN, MARS, and random forest) for shrub type.

Figure S-5. The color-density scatter plots between the estimated fractional snow cover and MODIS-derived fractional snow cover for four algorithms (linear regression, ANN, MARS, and random forest) for prairie type.

Figure S-6. The color-density scatter plots between the estimated fractional snow cover and MODIS-derived fractional snow cover for four algorithms (linear regression, ANN, MARS, and random forest) for bare land type.

Figure S-7. Comparison of the reference MODIS fractional snow cover (A) with our estimated fractional snow cover (B) in continuous value (6.25-km) on February 27th, 2017 (2017058)

Figure S-8. The accuracy indicators (OA, precision, recall, specificity, F1-score, kappa) of snow cover detection from two algorithm (Grody' algorithm; Random forest) for four land cover types.

Table S1. MODIS NDSI snow cover layer recoding description

| ID      | Description        | New ID                 |
|---------|--------------------|------------------------|
| 0 ~ 100 | NDSI snow cover    | Snow-covered/snow-free |
| 200     | Missing data       | Cloud                  |
| 201     | No decision        |                        |
| 211     | Night              |                        |
| 250     | Cloud              |                        |
| 254     | Detector saturated |                        |
| 237     | Inland water       | Water                  |
| 239     | Ocean              |                        |
| 255     | Fill               | Fill                   |

Table S2. The statistics of top nine important variables for random forest

| ID | Variables | Count (the maximum is 4) |
|----|-----------|--------------------------|
| 1  | Latitude  | 4                        |
| 2  | T37h      | 4                        |
| 3  | T37v      | 4                        |
| 4  | T85h      | 4                        |
| 5  | T85v      | 4                        |
| 6  | T_19v_37v | 4                        |
| 7  | T_22v_19v | 2                        |
| 8  | T_22v_85v | 4                        |
| 9  | T_37v_85v | 4                        |

5 Table S3. The optimization tests of learning rate of ANN on prairie dataset of 2017.

|                         | Test A-1 | Test A-2 | Test A-3 | Test A-4 |
|-------------------------|----------|----------|----------|----------|
| Hidden Layers           | 1        | 1        | 1        | 1        |
| Learning Rate           | 0.1      | 0.2      | 0.3      | 0.4      |
| R                       | 0.712    | 0.718    | 0.672    | 0.639    |
| MAE                     | 0.152    | 0.155    | 0.170    | 0.185    |
| RMSE                    | 0.192    | 0.198    | 0.212    | 0.230    |
| Time spent modeling / s | 50.86    | 13.18    | 13.95    | 13.47    |

Table S4. Variable selection tests in 6 scenarios on three land cover types (forest, shrub and prairie) for random forest method. The accuracy indexes of the estimation are calculated using OOB error estimates method.

| Land cover type | Indexes                 | Scenario-1 | Scenario-2 | Scenario-3 | Scenario-4 | Scenario-5 | Scenario-6 |
|-----------------|-------------------------|------------|------------|------------|------------|------------|------------|
| forest          | R                       | 0.699      | 0.594      | 0.505      | 0.696      | 0.688      | 0.646      |
|                 | MAE                     | 0.168      | 0.190      | 0.206      | 0.168      | 0.170      | 0.178      |
|                 | RMSE                    | 0.207      | 0.233      | 0.252      | 0.208      | 0.210      | 0.221      |
|                 | Time spent modeling / s | 8.38       | 6.81       | 3.77       | 6.34       | 6.4        | 6.73       |
| shrub           | R                       | 0.808      | 0.749      | 0.702      | 0.804      | 0.800      | 0.771      |
|                 | MAE                     | 0.140      | 0.158      | 0.169      | 0.141      | 0.142      | 0.151      |
|                 | RMSE                    | 0.187      | 0.209      | 0.226      | 0.188      | 0.190      | 0.201      |
|                 | Time spent modeling / s | 3.98       | 3.22       | 1.83       | 3.02       | 3.17       | 3.1        |
| prairie         | R                       | 0.743      | 0.650      | 0.599      | 0.743      | 0.743      | 0.698      |
|                 | MAE                     | 0.156      | 0.179      | 0.188      | 0.155      | 0.155      | 0.167      |
|                 | RMSE                    | 0.194      | 0.220      | 0.233      | 0.193      | 0.194      | 0.207      |
|                 | Time spent modeling / s | 8.45       | 6.82       | 4.18       | 7.08       | 6.53       | 6.43       |

Table S5. Variable selection tests in 6 scenarios on three land cover types (forest, shrub and prairie) for random forest method. The accuracy indexes of the estimation are calculated using 10-fold cross validation (CV).

| Land cover type | Indexes                 | Scenario-1 | Scenario-2 | Scenario-3 | Scenario-4 | Scenario-5 | Scenario-6 |
|-----------------|-------------------------|------------|------------|------------|------------|------------|------------|
| forest          | R                       | 0.704      | 0.599      | 0.506      | 0.699      | 0.693      | 0.652      |
|                 | MAE                     | 0.167      | 0.190      | 0.205      | 0.168      | 0.169      | 0.178      |
|                 | RMSE                    | 0.206      | 0.231      | 0.251      | 0.207      | 0.209      | 0.219      |
|                 | Time spent modeling / s | 8.38       | 6.81       | 3.77       | 6.34       | 6.4        | 6.73       |
| shrub           | R                       | 0.808      | 0.754      | 0.704      | 0.806      | 0.802      | 0.773      |
|                 | MAE                     | 0.140      | 0.157      | 0.169      | 0.140      | 0.142      | 0.150      |
|                 | RMSE                    | 0.187      | 0.208      | 0.225      | 0.187      | 0.189      | 0.200      |
|                 | Time spent modeling / s | 3.98       | 3.22       | 1.83       | 3.02       | 3.17       | 3.1        |
| prairie         | R                       | 0.746      | 0.659      | 0.606      | 0.746      | 0.747      | 0.701      |
|                 | MAE                     | 0.156      | 0.177      | 0.189      | 0.155      | 0.155      | 0.166      |
|                 | RMSE                    | 0.193      | 0.217      | 0.231      | 0.193      | 0.193      | 0.206      |
|                 | Time spent modeling / s | 8.45       | 6.82       | 4.18       | 7.08       | 6.53       | 6.43       |

Linear Regression formula, in which, FSC denotes fractional snow cover,  $a_1 \sim a_{12}$  means the regression coefficient of each variable, b is the intercept term:

$$FSC = a_1 * lat + a_2 * lon + a_3 * dem + a_4 * slope + a_5 * aspect + a_6 * T_{19v_{19h}} + a_7 * T_{19v_{37v}} + a_8 * T_{19h_{37h}} + a_9 * T_{22v_{19v}} + a_{10} * T_{22v_{85v}} + a_{11} * T_{37v_{37h}} + a_{12} * T_{37v_{85v}} + b \quad (S-1)$$

Table S6. The parameters of Linear regression formula

|          | Forest  | Shrub    | Prairie  | Bare land |
|----------|---------|----------|----------|-----------|
| $a_1$    | 1.7124  | 1.8286   | 1.3451   | 1.041     |
| $a_2$    | 0.5667  | 0.7326   | 0.3796   | 1.041     |
| $a_3$    | 0.6148  | 0.1765   | -0.1648  | 0.1324    |
| $a_4$    | -0.1449 | 0.2597   | -0.178   | 0.4921    |
| $a_5$    | 0.0266  | 0.0134   | -0.1605  | 0.0403    |
| $a_6$    | 10.1795 | 13.1437  | -23.7192 | 25.3841   |
| $a_7$    | -9.1104 | -4.7906  | 31.3559  | -32.695   |
| $a_8$    | 8.8293  | 12.7346  | -24.478  | 23.8666   |
| $a_9$    | -2.4825 | 8.1627   | 9.6261   | -7.1022   |
| $a_{10}$ | 2.2213  | -5.2339  | -4.2919  | 12.2749   |
| $a_{11}$ | -8.5071 | -12.9567 | 22.4968  | -23.3069  |
| $a_{12}$ | -0.8334 | 6.5589   | 6.4447   | -10.2661  |
| $b$      | -1.1476 | -9.7496  | -9.1063  | 4.9851    |

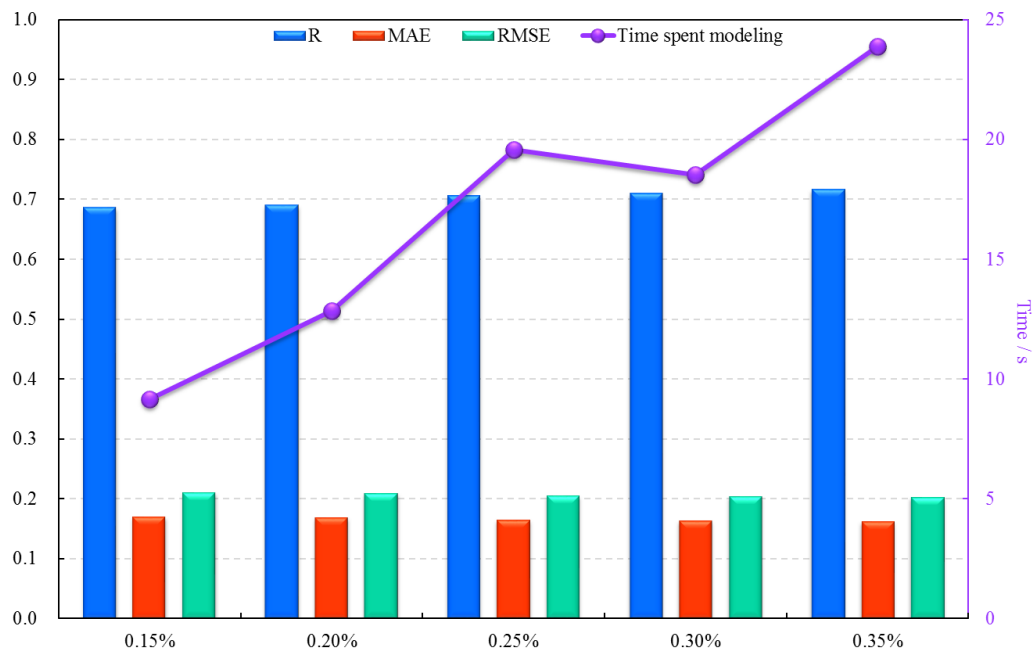

Figure S-1. Using OOB error estimates to evaluate the performance of random forest models with increasing training sample size for forest type

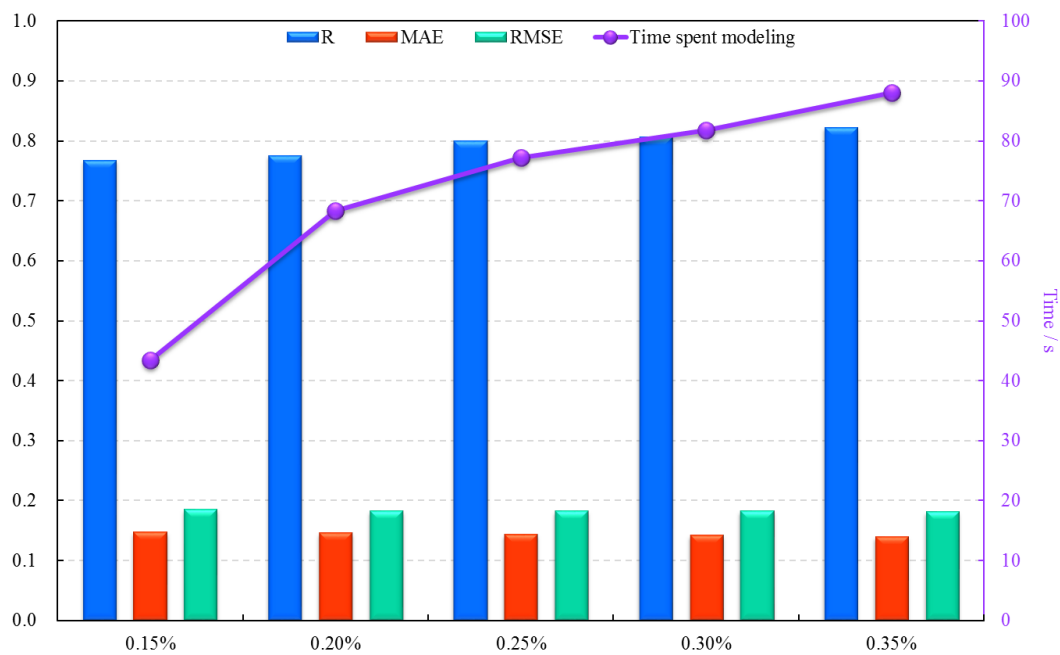

5 Figure S-2 Using OOB error estimates to evaluate the performance of random forest models with increasing training sample size for prairie type

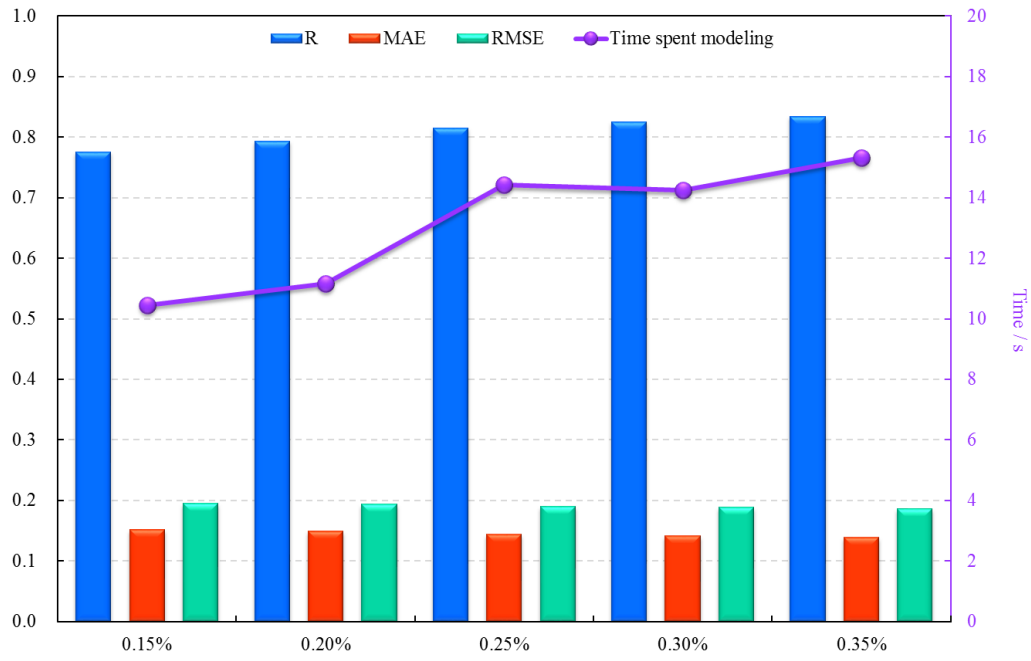

Figure S-3 Using OOB error estimates to evaluate the performance of random forest models with increasing training sample size for bare land type

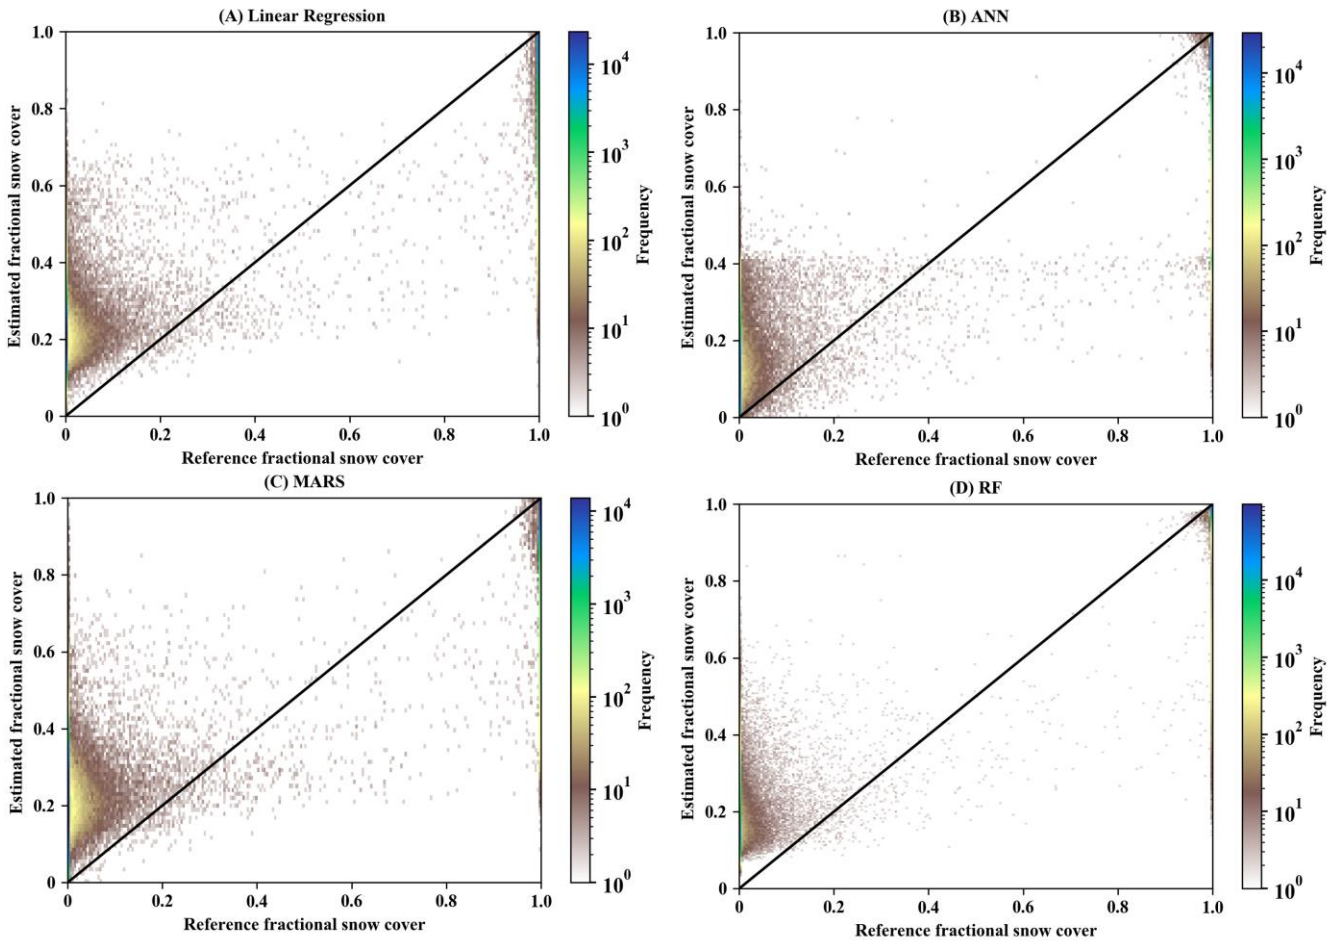

Figure S-4 The color-density scatter plots between the estimated fractional snow cover and MODIS-derived fractional snow cover for four algorithms (linear regression, ANN, MARS, and random forest) for shrub type. The accuracy metric refer to Table 5. [Note: out of range fractional snow cover values of linear regression, ANN and MARS were truncated on 0 and 1]

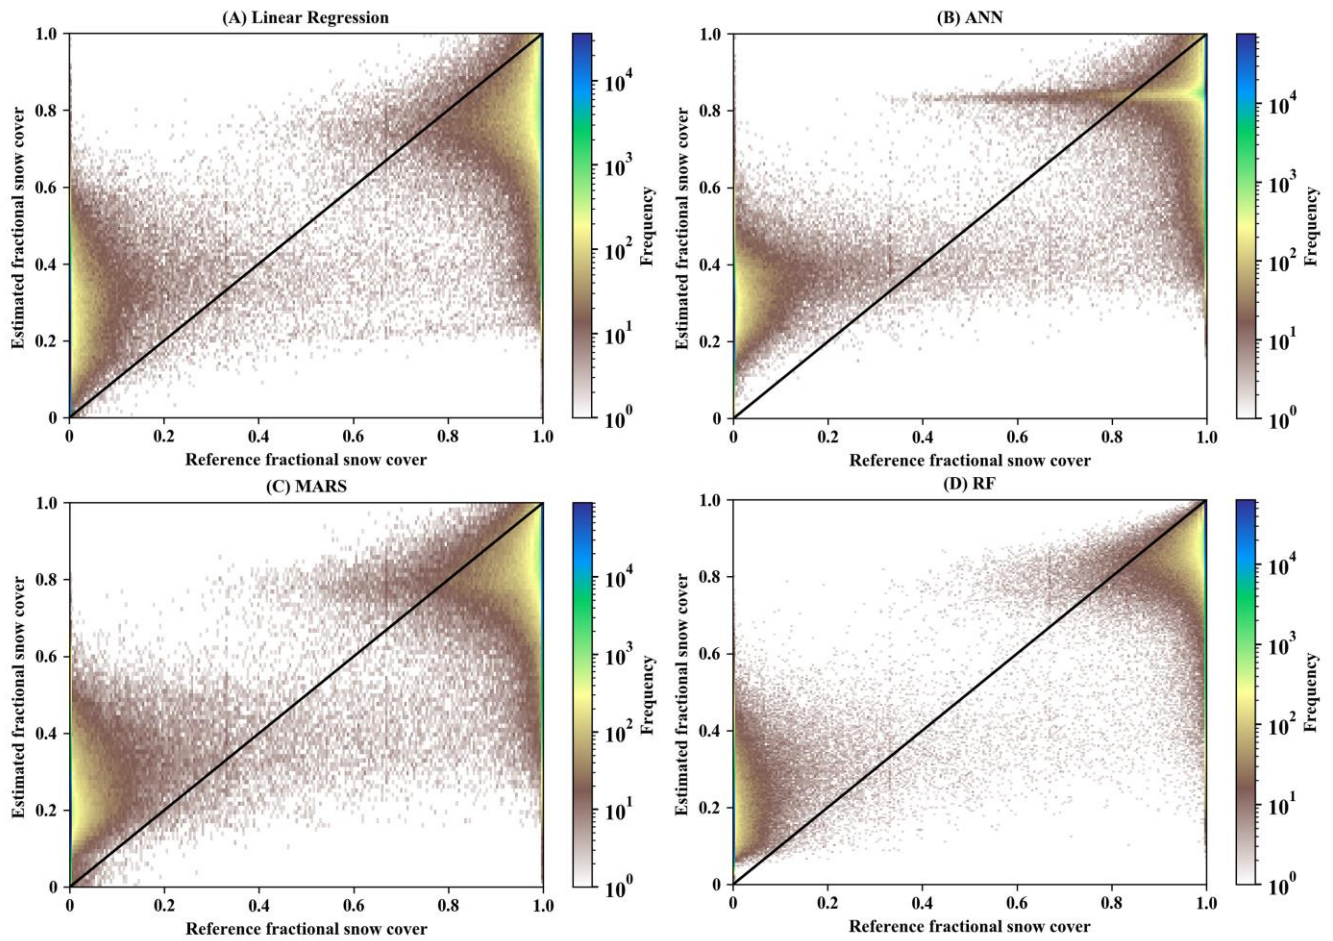

Figure S-5 The color-density scatter plots between the estimated fractional snow cover and MODIS-derived fractional snow cover for four algorithms (linear regression, ANN, MARS, and random forest) for prairie type. The accuracy metric refer to Table 5. [Note: out of range fractional snow cover values of linear regression, ANN and MARS were truncated on 0 and 1]



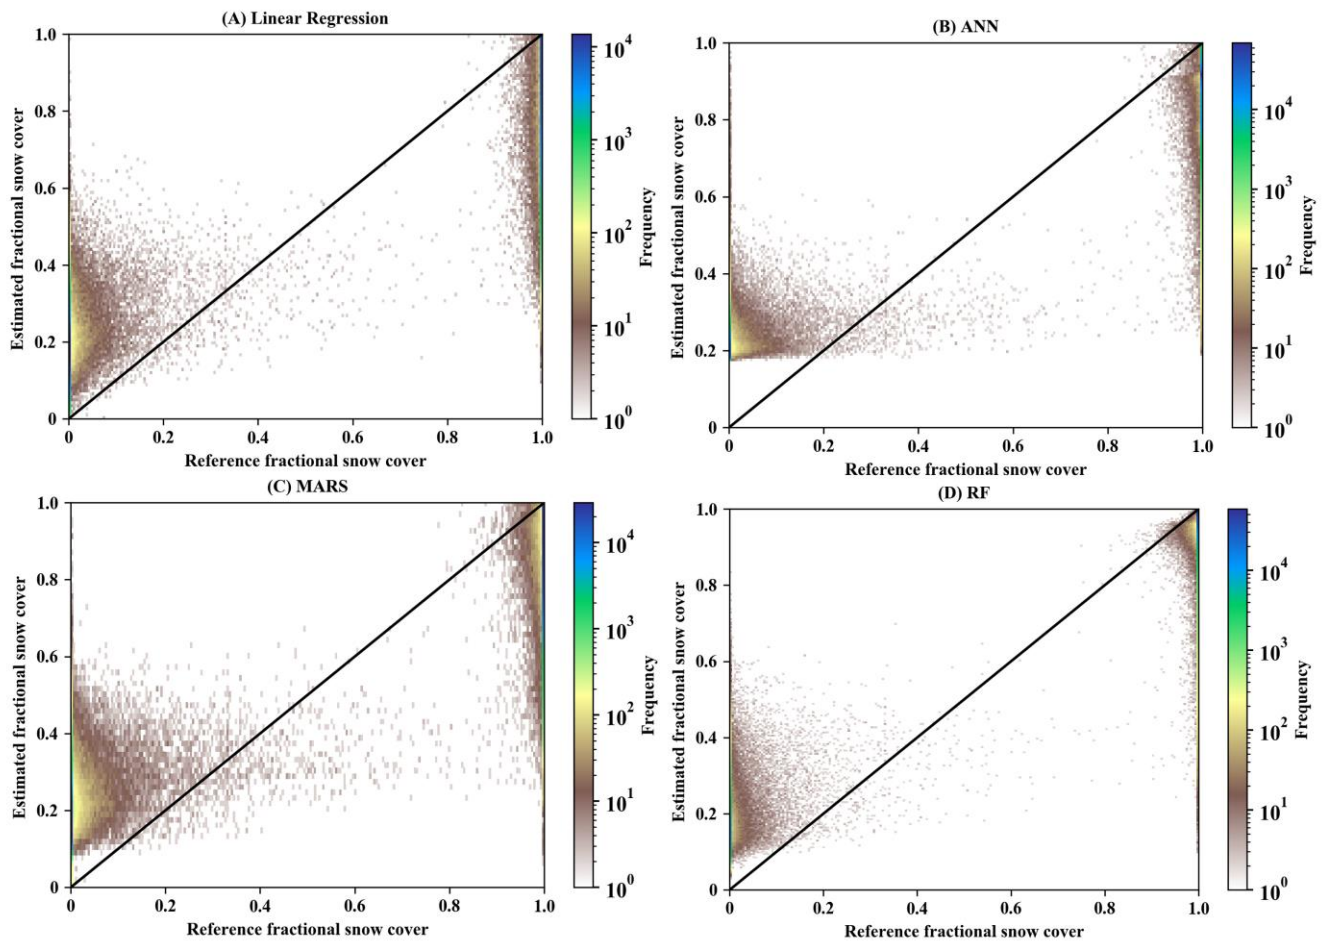

Figure S-6 The color-density scatter plots between the estimated fractional snow cover and MODIS-derived fractional snow cover for four algorithms (linear regression, ANN, MARS, and random forest) for bare land type. The accuracy metric refer to Table 5. [Note: out of range fractional snow cover values of linear regression, ANN and MARS were truncated on 0 and 1]

5

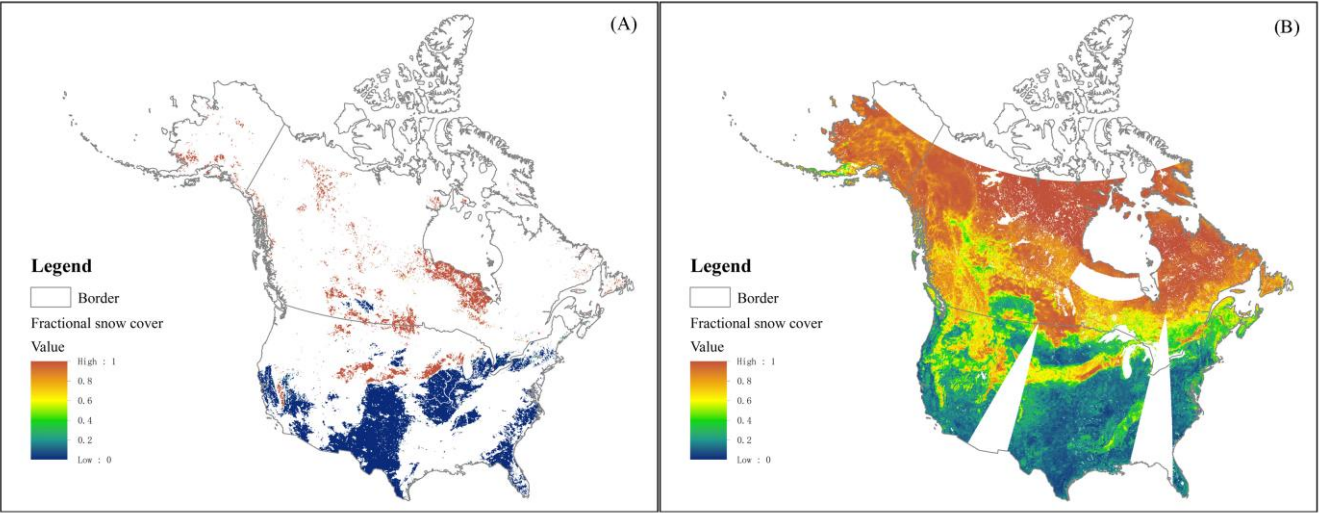

Figure S-7. Comparison of the reference MODIS fractional snow cover (A) with our estimated fractional snow cover (B) in continuous value (6.25-km) on February 27th, 2017 (2017058)

10

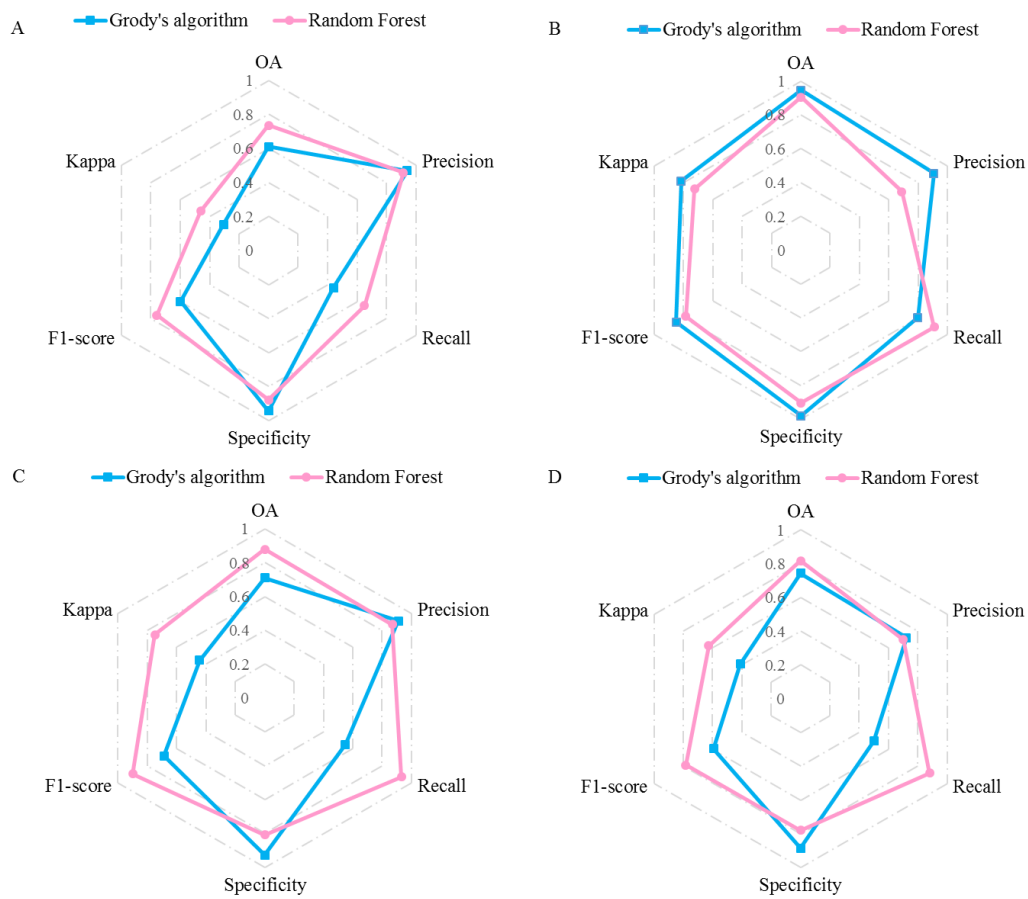

Figure. S-8. The accuracy indicators (OA, precision, recall, specificity, F1-score, kappa) of snow cover detection from two algorithm (Grody' algorithm; Random forest) for four land cover types (A: forest; B: shrub; C: prairie; D: bare land)
